# Supplementary material for: Poly (ADP-ribose) polymerase 1 transcriptional regulation: A novel crosstalk between histone modification H3K9ac and ETS1 motif hypomethylation in BRCA1-mutated ovarian cancer
Source: PubMed Central journal article supplement (PMC3960209; doi:10.18632/oncotarget.1549), 2013-12-29
Supplement: oncotarget-05-0291-s001.pdf [file oncotarget-05-0291-s001.pdf]

**Supplementary Figure 1.** H3K9ac (A and C) or ETS1 (B and D) enrichment after silencing (A and B) or overexpression (C and D) of BRCA1 in 293T cells, SKOV3 cells, primary non-mutated and BRCA1-mutated ovarian cancer cells.

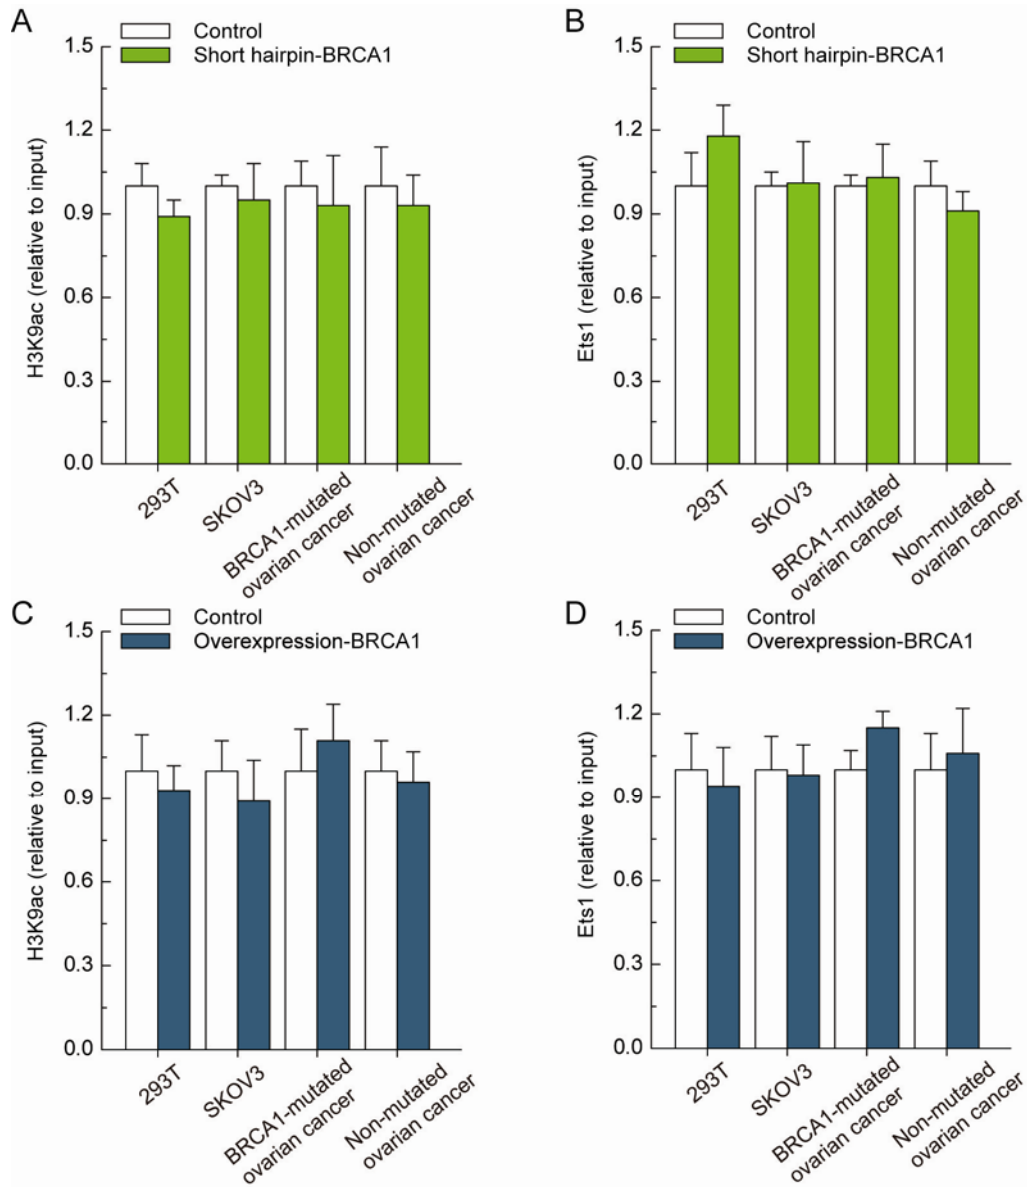

**Supplementary Table 1.** Primers used in this study.

| Gene              | Primers                                         | Description                       |
|-------------------|-------------------------------------------------|-----------------------------------|
| PARP1-promoter-F  | 5'- AATAAAAGGGGGAGGGGTTG                        | Promoter amplification            |
| PARP1-promoter-R  | 5'- GAAAGGAGAAGAGAAGAGGC                        |                                   |
| PARP1-RTP-F       | 5'- GAGTCGGCGATCTTGGACC                         | Real-time PCR for PARP1           |
| PARP1-RTP-R       | 5'- TGACCCGAGCATTCTCTCG                         |                                   |
| GAPDH-RTP-F       | 5'- AGGTGAAGGTCGGAGTCA                          | Real-time PCR for GAPDH           |
| GAPDH-RTP-R       | 5'- GGTCATTGATGGCAACAA                          |                                   |
| GCN5-SQP          | Santa Cruz Biotech<br>GCN5 (h)-PR: sc-37946-PR  | Semi-quantitative PCR for<br>GCN5 |
| PCAF-SQP          | Santa Cruz Biotech<br>PCAF (h)-PR: sc-36198-PR  | Semi-quantitative PCR for<br>PCAF |
| ETS1-SQP          | Santa Cruz Biotech<br>ETS-1 (h)-PR: sc-29309-PR | Semi-quantitative PCR for<br>ETS1 |
| PARP1-ChIP-RTP-F  | 5'- CAGCGTGTTTCTAGGTCGTG                        | ChIP for PARP1 (Detection         |
| PARP1-ChIP-RTP-R  | 5'- GATAGAGCTTATCCGAAGAC                        | by real-time PCR)                 |
| PARP1-ChIP-SQP-F  | 5'- ATCAGCAATCTATCAGGGAA                        | ChIP for PARP1 (Detection         |
| PARP1-ChIP-SQP-R  | 5'- TGCTCTCGCTGCATTTCTTG                        | by semi-quantitative PCR)         |
| PARP1-Mutation1-F | 5'- CCGTGGACGCGGGTTCTGTGGGCGTTCCCGC             | A point mutation at the site      |
| PARP1-Mutation1-R | 5'- GCGGGAACGCCACAGAACCCGCGTCCACGG              | of -31 (C to T)                   |
| PARP1-Mutation2-F | 5'- GGCGTCGGGCTTCTGGAGCTTTGGCGGCAGC             | A point mutation at the site      |
| PARP1-Mutation2-R | 5'- CTGCCGCCAAAGCTCCAGAAGCCCGACGCCA             | of +133 (C to T)                  |

**List of abbreviations used:** F, Forward primer; R, Reverse primer; RTP, Real-time PCR; SQP, Semi-quantitative PCR; ChIP, Chromatin immunoprecipitation.

**Supplementary Table 2.** List of commercial antibodies.

| <b>Antibody</b> | <b>Company (catalog number)</b> | <b>Description</b> |
|-----------------|---------------------------------|--------------------|
| H3K9Ac          | Abcam (ab4441)                  | ChIP               |
| H3K18Ac         | Abcam (ab1191)                  | ChIP               |
| H3K27Ac         | Millipore (07-360)              | ChIP               |
| H3K4me1         | Abcam (ab8895)                  | ChIP               |
| H3K4me2         | Abcam (ab7766)                  | ChIP               |
| H3K4me3         | Abcam (ab8580)                  | ChIP               |
| H3K36me3        | Abcam (ab9050)                  | ChIP               |
| H3K79me         | Abcam (ab2886)                  | ChIP               |
| H3K9me          | Abcam (ab9045)                  | ChIP               |
| H3K9me2         | Millipore (07-441)              | ChIP               |
| H3K9me3         | Abcam (ab8898)                  | ChIP               |
| H3K27me         | Millipore (07-448)              | ChIP               |
| H3K27me2        | Millipore (07-452)              | ChIP               |
| H3K27me3        | Millipore (07-449)              | ChIP               |
| Ets1            | Santa Cruz (sc-350)             | ChIP, CO-IP, WB    |
| GCN5            | Santa Cruz (sc-20698)           | CO-IP, WB          |
| PCAF            | Santa Cruz (sc-13124)           | CO-IP, WB          |

**List of abbreviations used:** ChIP, Chromatin immunoprecipitation; CO-IP, Co-immunoprecipitation; WB, Western blotting.
